# Supplementary material for: Doxorubicin-Loaded Silica Nanocomposites for Cancer Treatment
Source: MDPI journal article supplement (doi:10.3390/coatings13020324), 2023-02-01
Supplement: s1 [file s1]

**Doxorubicin-loaded Silica Nanocomposites for Cancer Treatment**

Victoriya Popova, Yuliya Poletaeva, Alexey Chubarov, Dmitrii Pyshnyi and Elena Dmitrienko

Institute of Chemical Biology and Fundamental Medicine (ICBFM), Siberian Branch of Russian Academy of Sciences, 8 Lavrentiev Avenue, 630090 Novosibirsk, Russia

|                                                                                                                                                                                            |   |
|--------------------------------------------------------------------------------------------------------------------------------------------------------------------------------------------|---|
| <b>Figure S1.</b> DLS size distribution data (Number, Volume, and Intensity) for method Rao et al. [68] with 0.018 M TEOS. ....                                                            | 2 |
| <b>Figure S2.</b> DLS size distribution data (Number, Volume, and Intensity) for method Rao et al. [68] with 0.018 M TEOS in 50 mL synthesis conditions. ....                              | 3 |
| <b>Figure S3.</b> DLS size distribution data (Number, Volume, and Intensity) for method Rao et al. [68] with 0.018 M TEOS after one year storage. ....                                     | 4 |
| <b>Figure S4.</b> DLS size distribution data (Number) for method Rao et al. [68] with 0.018 M TEOS after synthesis (up) and after one year storage (bottom). ....                          | 5 |
| <b>Figure S5.</b> DLS size distribution data (Number) for method Rao et al. [68] with 0.018 M TEOS diluted in 100 mM sodium acetate buffer pH 4 (up), and after 7 days (bottom). ....      | 5 |
| <b>Figure S6.</b> DLS size distribution data (Number) for method Rao et al. [68] with 0.018 M TEOS diluted in 100 mM sodium acetate buffer pH 5 (up), and after 7 days (bottom). ....      | 6 |
| <b>Figure S7.</b> DLS size distribution data (Number) for method Rao et al. [68] with 0.018 M TEOS in 100 mM sodium acetate buffer pH 6 (up), and after 7 days (bottom). ....              | 6 |
| <b>Figure S8.</b> DLS size distribution data (Number) for method Rao et al. [68] with 0.018 M TEOS diluted in 10 mM phosphate-buffered saline pH 7.4 (up), and after 7 days (bottom). .... | 7 |
| <b>Figure S9.</b> DLS size distribution data (Number, Volume) for method Rao et al. [68] with 0.018 M TEOS diluted in fetal bovine serum. ....                                             | 7 |
| <b>Figure S10.</b> DLS size distribution data (Number, Volume) for method Rao et al. [68] with 0.018 M TEOS diluted in fetal bovine serum (after 10 days). ....                            | 8 |
| <b>Figure S11.</b> DLS size distribution data (Number) for method Rao et al. [68] with 0.018 M TEOS diluted in fetal bovine serum (up), and after 10 days (bottom). ....                   | 8 |
| <b>Figure S12.</b> The FT-IR spectra of SiNPs and SiNPs-Nylon ....                                                                                                                         | 9 |
| <b>Figure S13.</b> Scheme of the qualitative reaction of the nylon determination in SiNPs and SiNPs-Nylon with N-(2-hydroxyethyl)-Phenazinium ion. ....                                    | 9 |
| <b>Figure S14.</b> Cell viability assay. HEK 293FT cell line was incubated for 48 h with SiNPs, SiNPs-DOX, and DOX. ....                                                                   | 9 |

Silica nanoparticles (SiNPs) were characterized using dynamic light scattering (DLS) on a Malvern Zetasizer Nano device (Malvern Instruments, Great Britain). For DLS studies, nanoparticles were diluted in deionized water to a concentration of 250  $\mu\text{g/mL}$ .

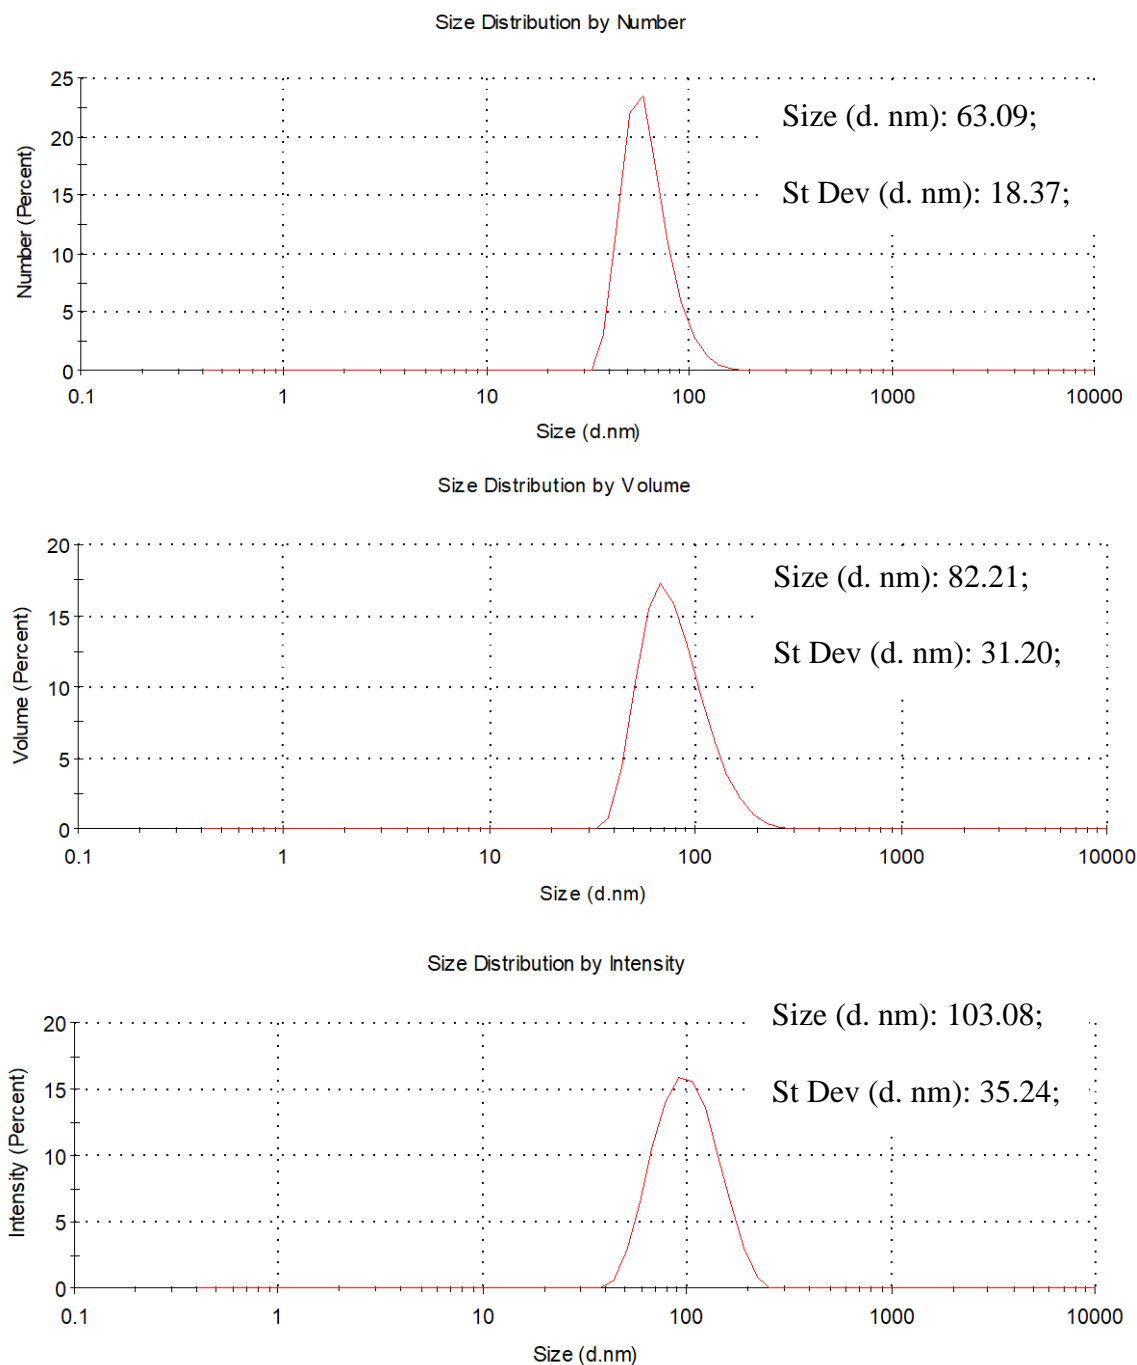

**Figure S1.** DLS size distribution data (Number, Volume, and Intensity) for method Rao et al. [68] with 0.018 M TEOS. The particle size by Number is  $63 \pm 1$  nm ( $\text{PDI} = 0.09 \pm 0.01$ ).

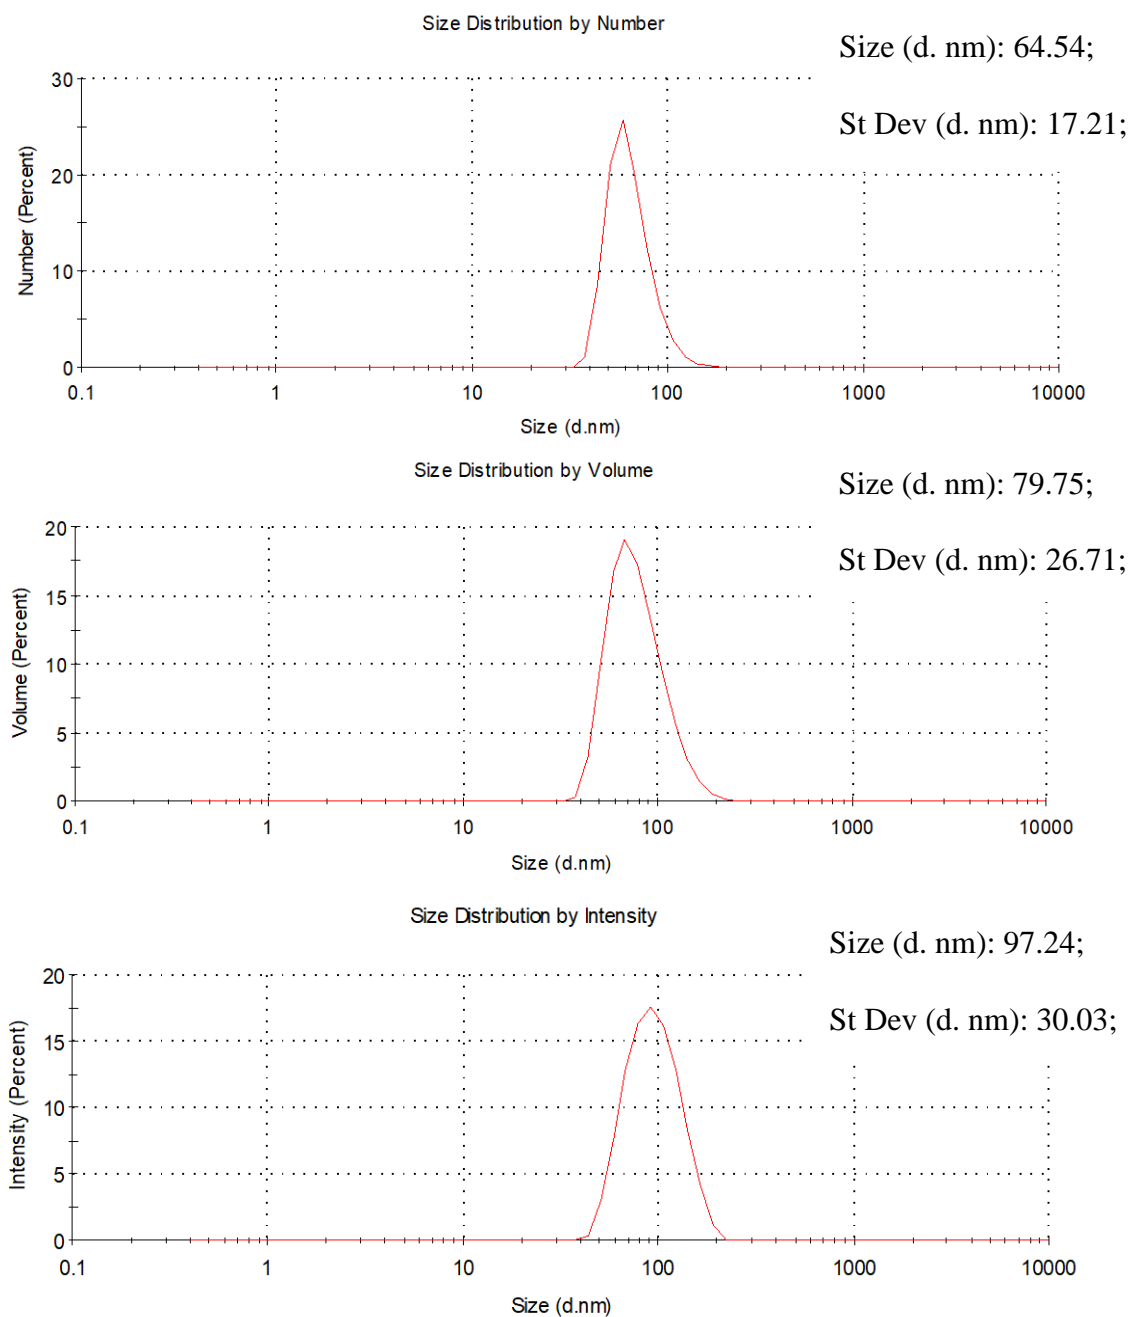

**Figure S2.** DLS size distribution data (Number, Volume, and Intensity) for method Rao et al. [68] with 0.018 M TEOS in 50 mL synthesis conditions. The particle size by Number is  $64 \pm 2$  nm ( $\text{PDI} = 0.10 \pm 0.01$ ).

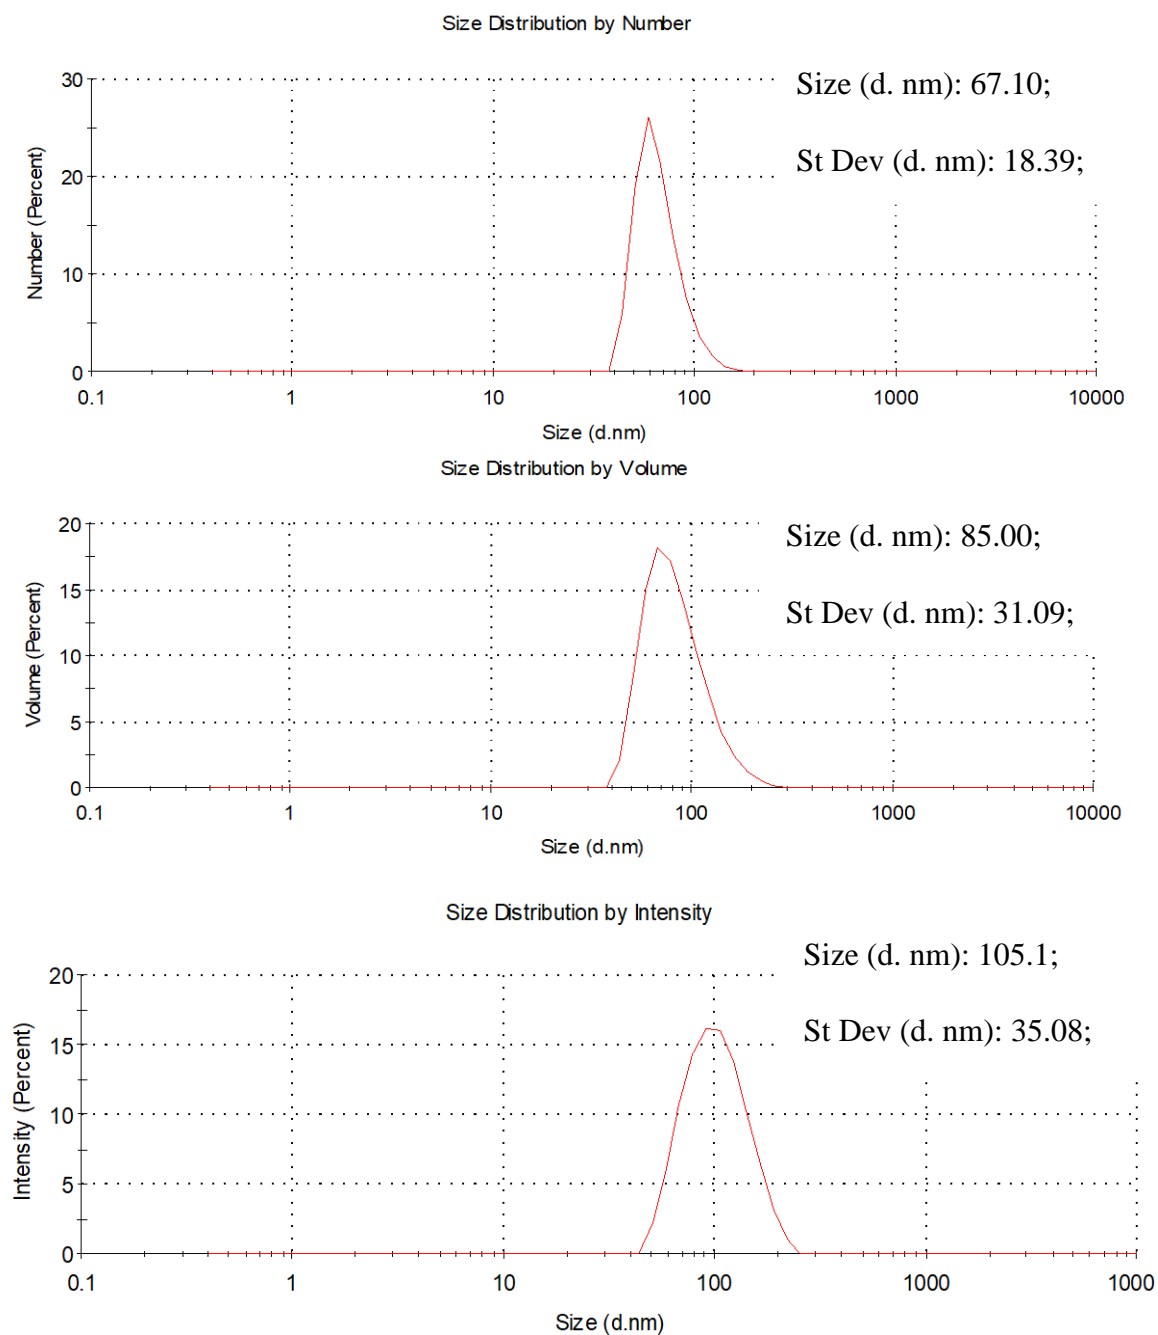

**Figure S3.** DLS size distribution data (Number, Volume, and Intensity) for method Rao et al. [68] with 0.018 M TEOS after one year storage. The particle size by Number is  $67 \pm 5$  nm ( $\text{PDI} = 0.10 \pm 0.01$ ).

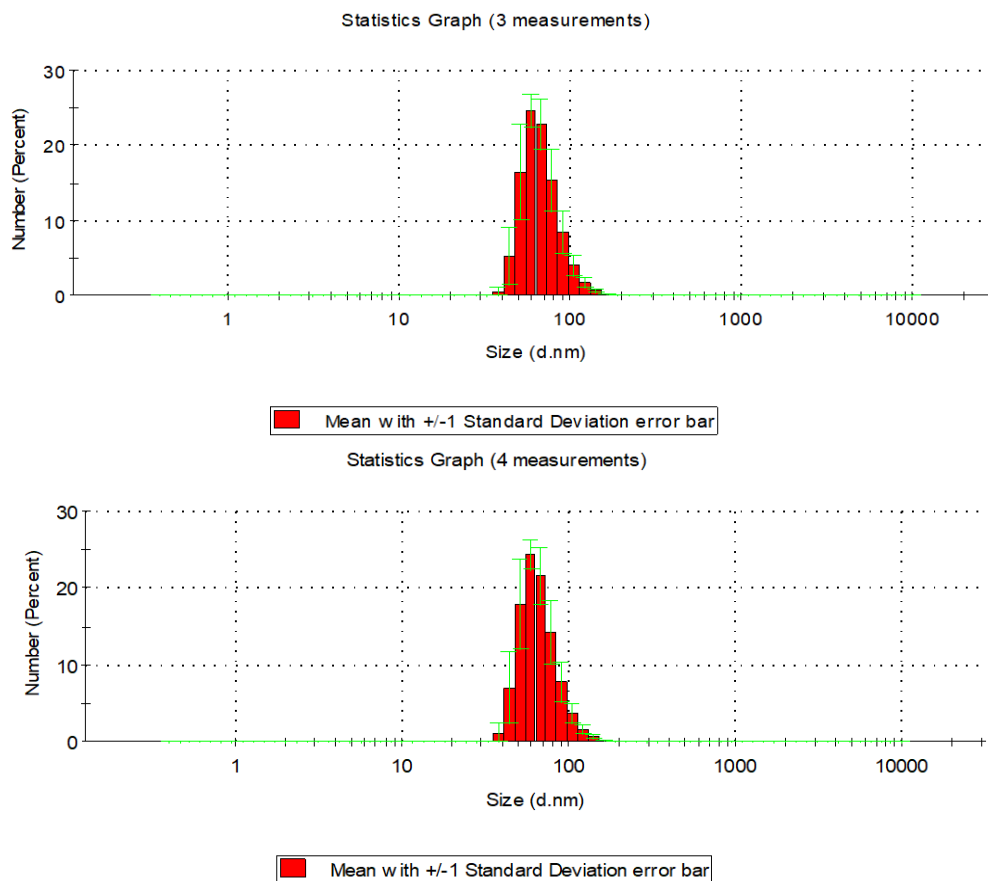

**Figure S4.** DLS size distribution data (Number) for method Rao et al. [68] with 0.018 M TEOS after synthesis (up) and after one year storage (bottom).

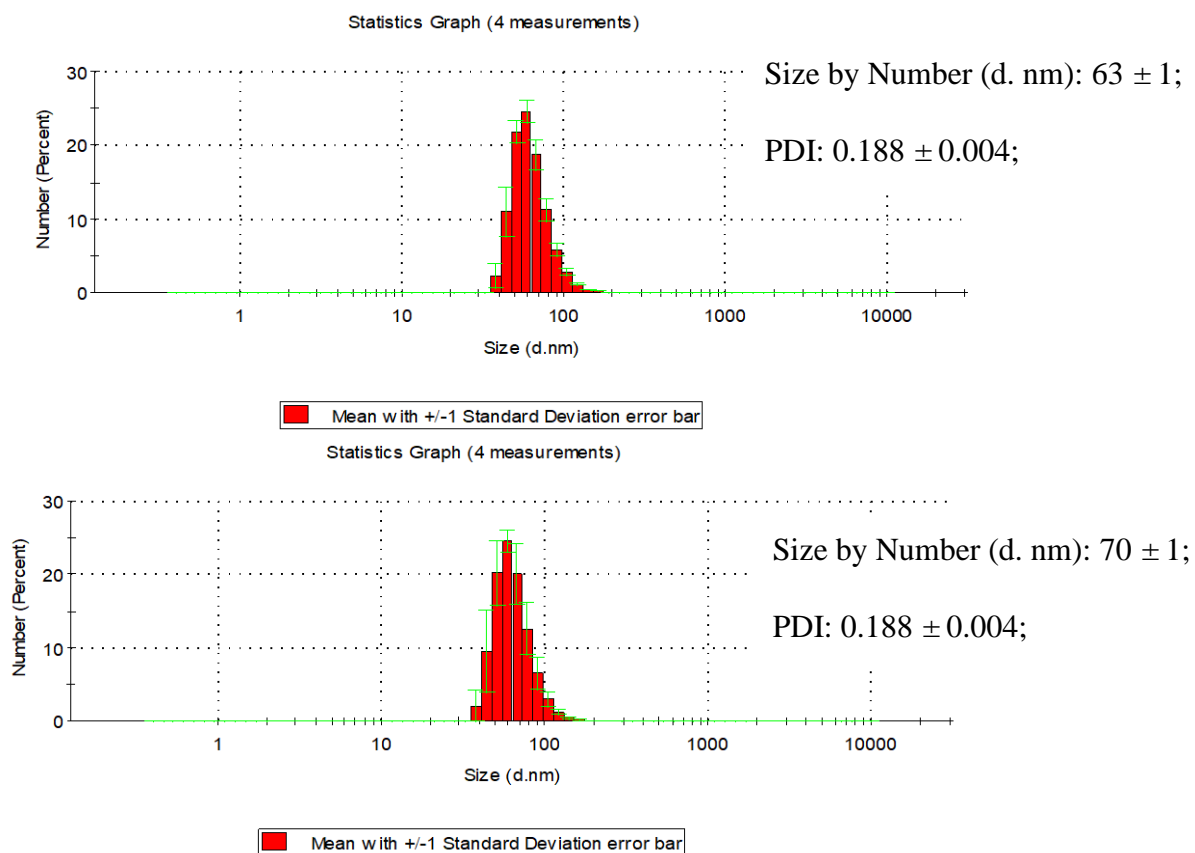

**Figure S5.** DLS size distribution data (Number) for method Rao et al. [68] with 0.018 M TEOS diluted in 100 mM sodium acetate buffer pH 4 (up), and after 7 days (bottom).

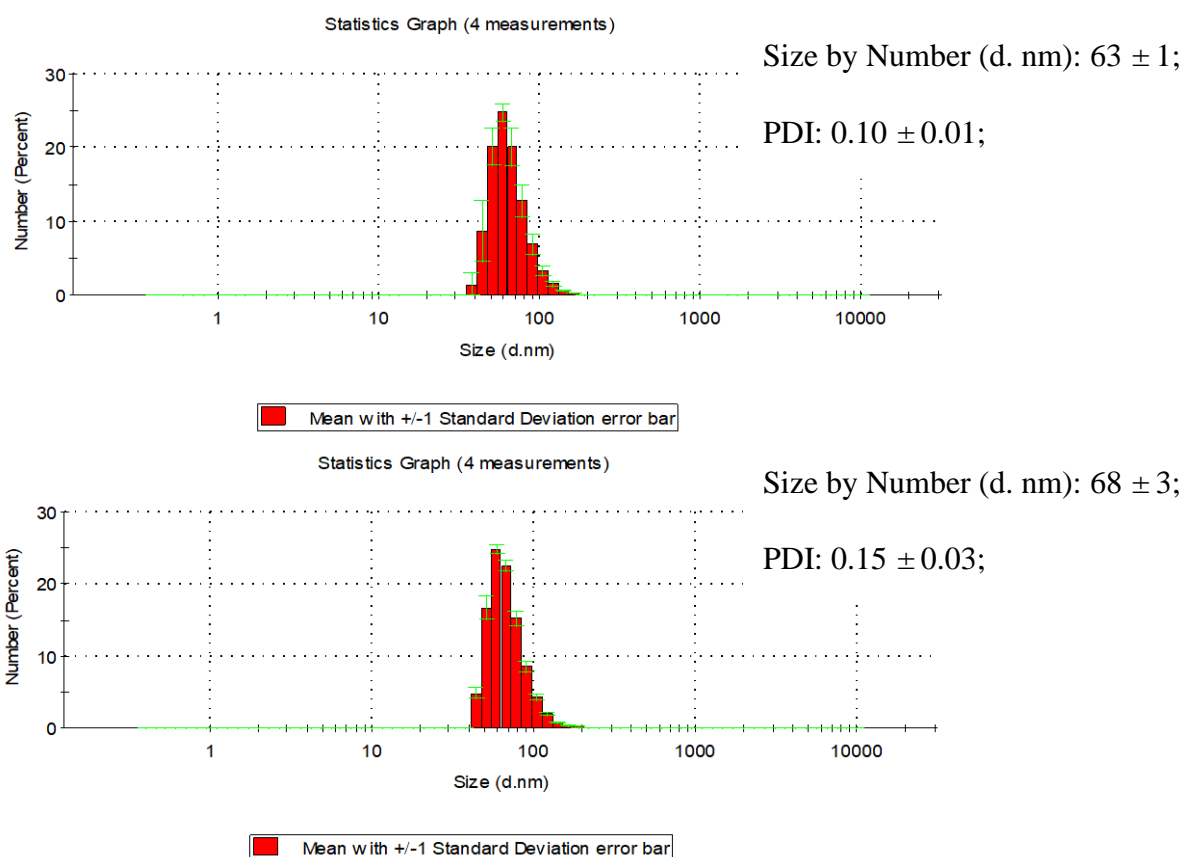

**Figure S6.** DLS size distribution data (Number) for method Rao et al. [68] with 0.018 M TEOS diluted in 100 mM sodium acetate buffer pH 5 (up), and after 7 days (bottom).

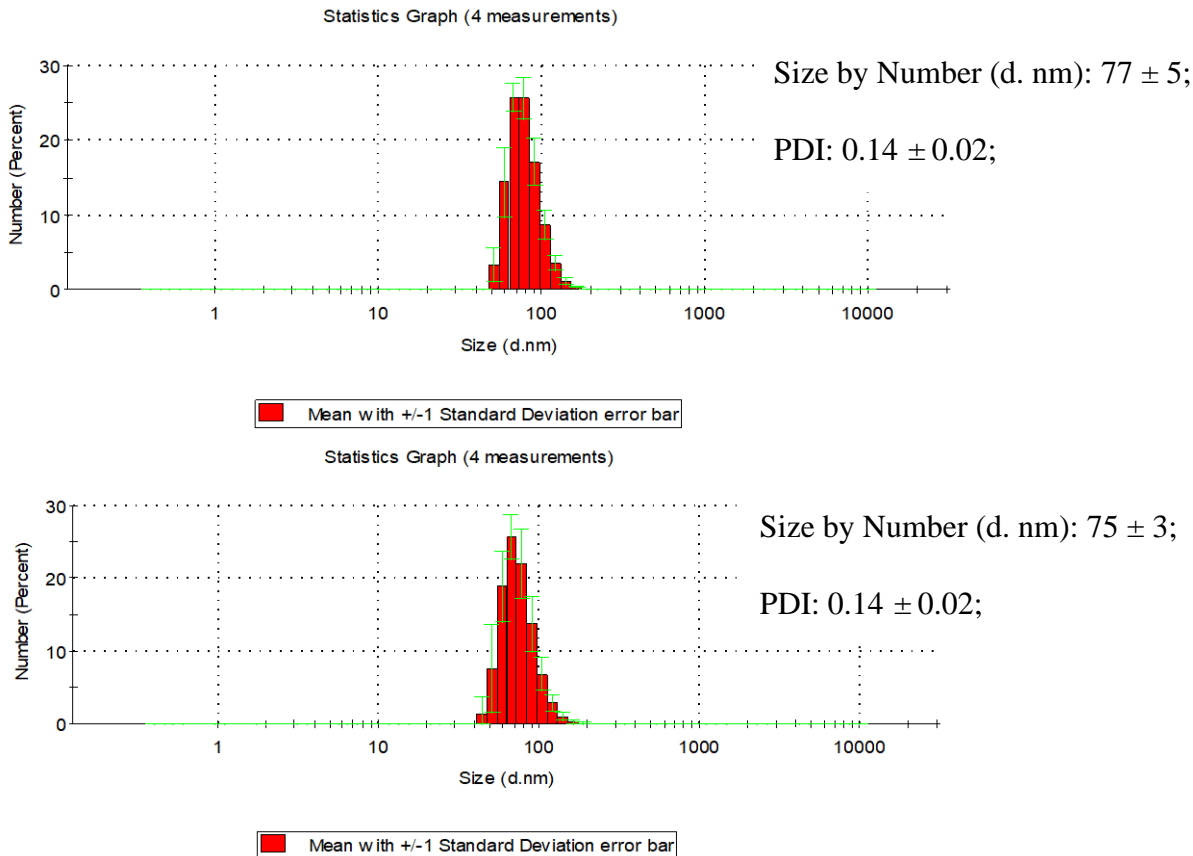

**Figure S7.** DLS size distribution data (Number) for method Rao et al. [68] with 0.018 M TEOS in 100 mM sodium acetate buffer pH 6 (up), and after 7 days (bottom).

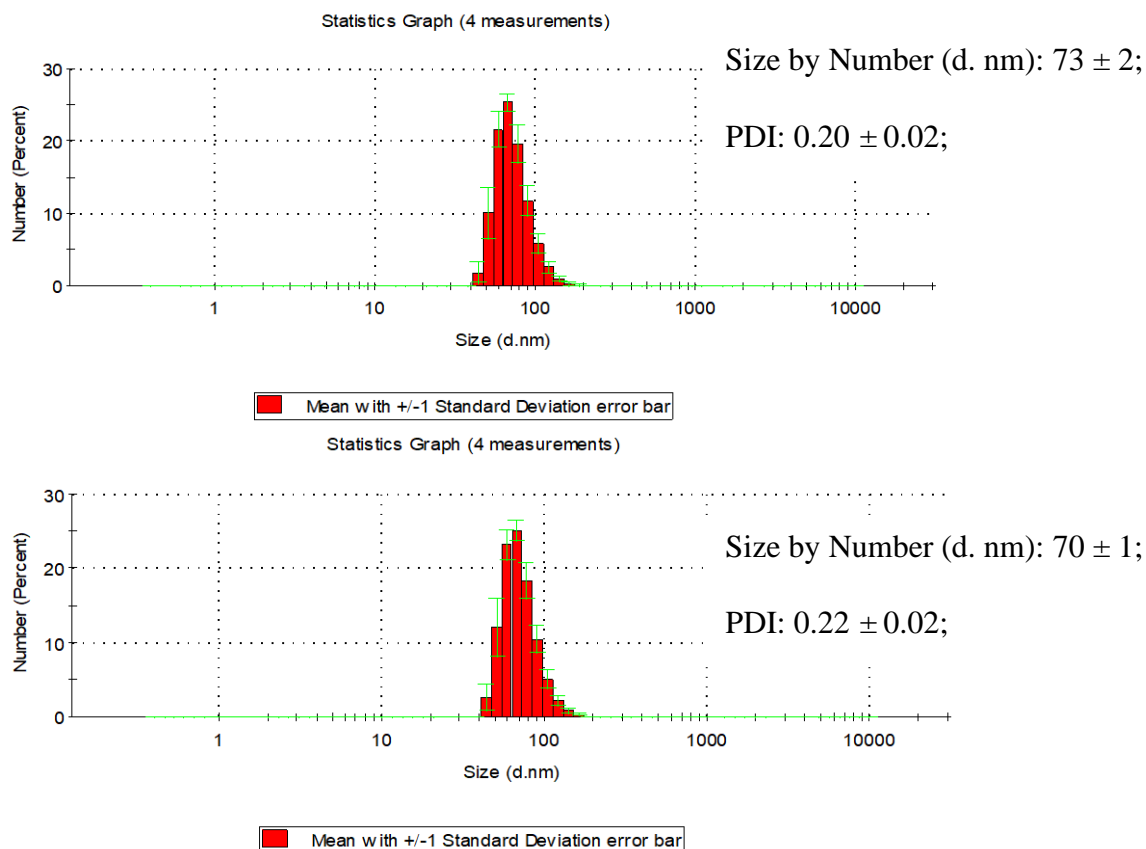

**Figure S8.** DLS size distribution data (Number) for method Rao et al. [68] with 0.018 M TEOS diluted in 10 mM phosphate-buffered saline pH 7.4 (up), and after 7 days (bottom).

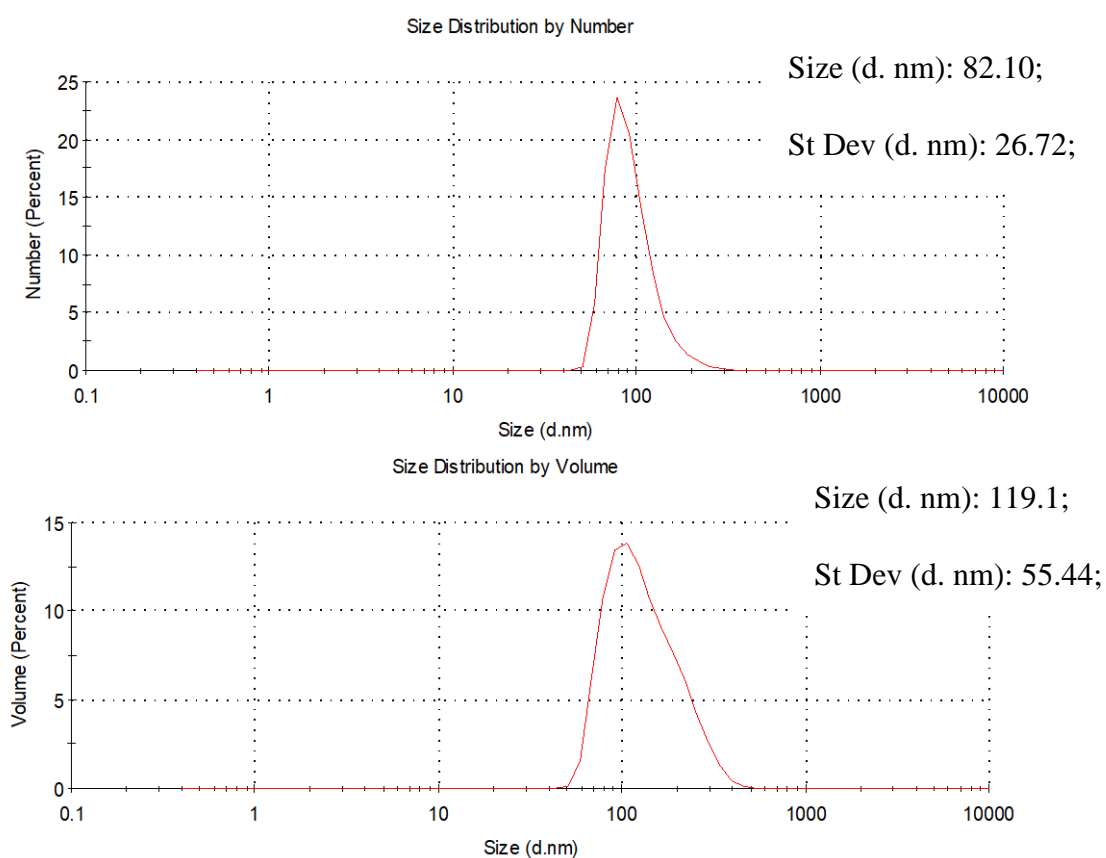

**Figure S9.** DLS size distribution data (Number, Volume) for method Rao et al. [68] with 0.018 M TEOS diluted in fetal bovine serum. The particle size was determined by the DLS method to be  $82 \pm 3$  nm, with a PDI of  $0.30 \pm 0.01$ .

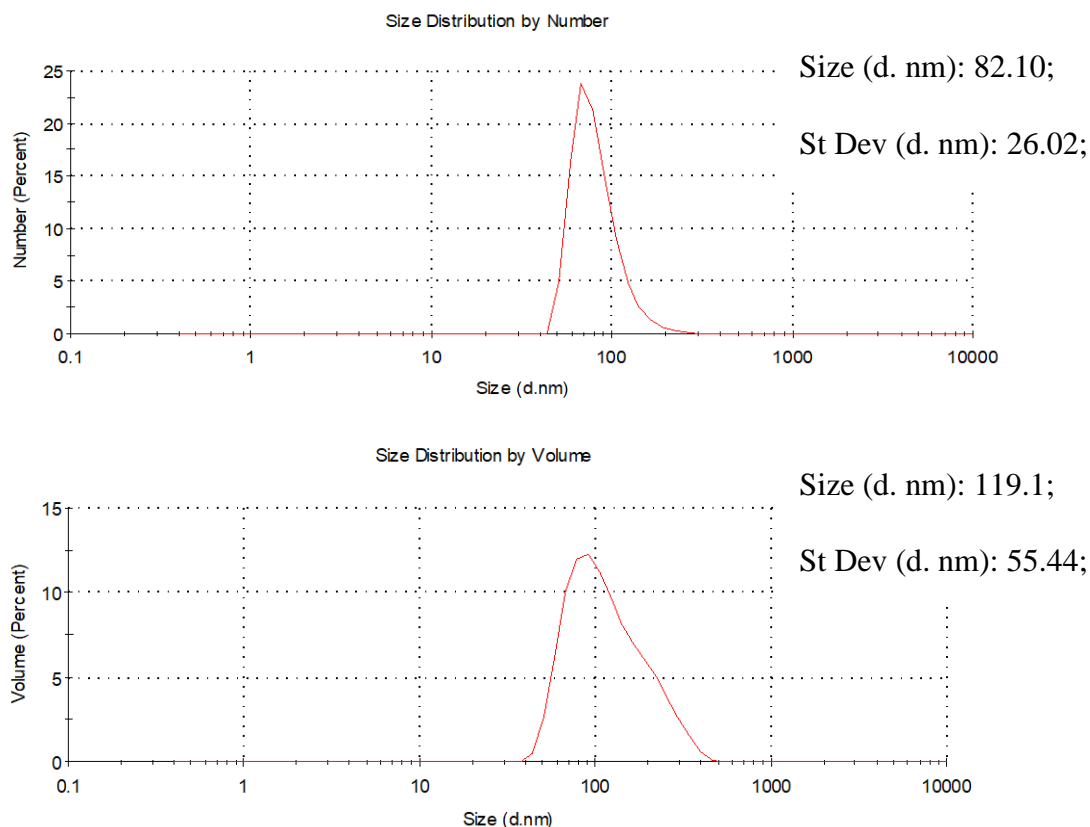

**Figure S10.** DLS size distribution data (Number, Volume) for method Rao et al. [68] with 0.018 M TEOS diluted in fetal bovine serum (after 10 days). The particle size was determined by the DLS method to be  $80 \pm 5$  nm, with a PDI of  $0.20 \pm 0.01$ .

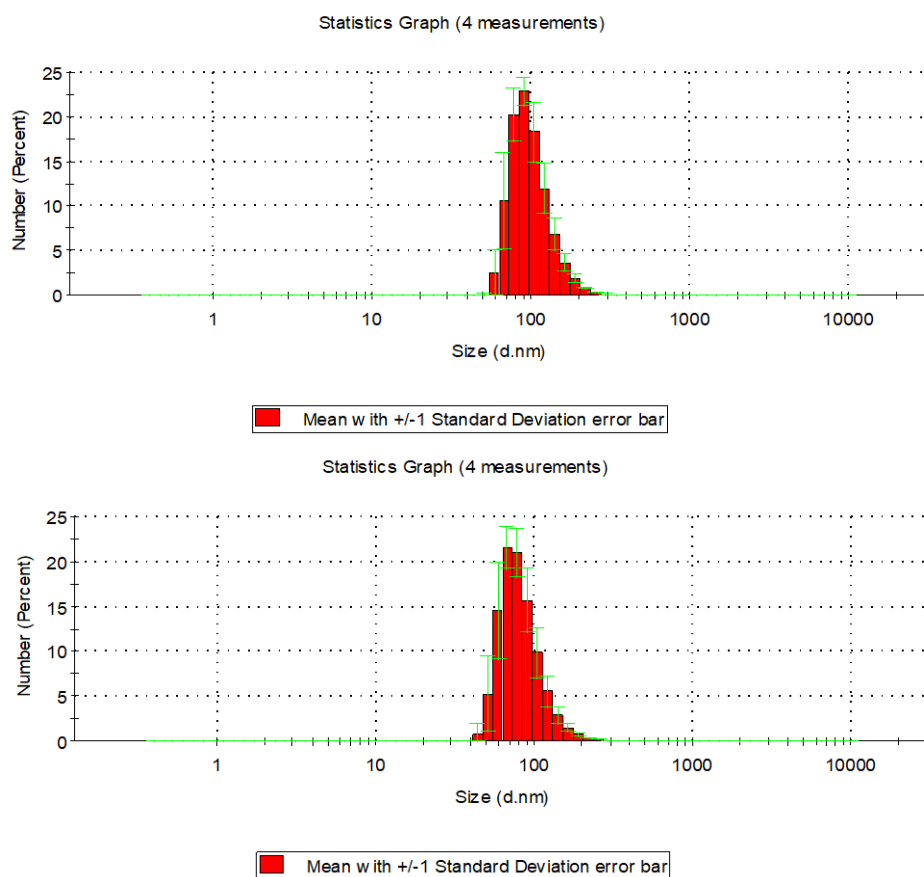

**Figure S11.** DLS size distribution data (Number) for method Rao et al. [68] with 0.018 M TEOS diluted in fetal bovine serum (up), and after 10 days (bottom).



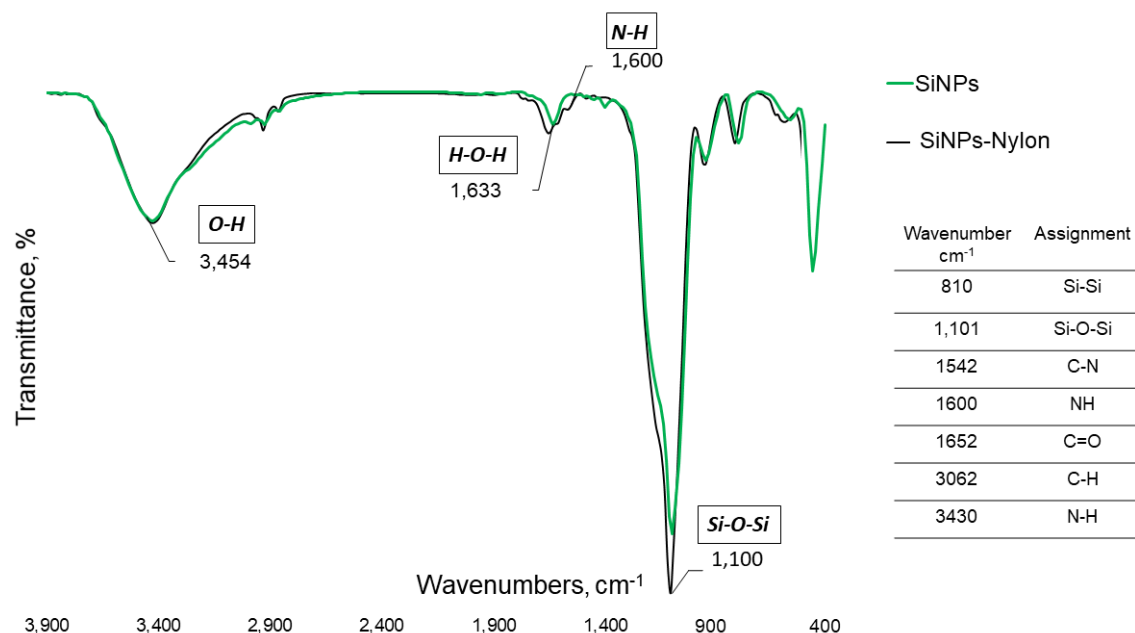

**Figure S12.** The FT-IR spectra of SiNPs and SiNPs-Nylon in KBr pellets using a Varian 640-IR-spectrometer (Varian, Louisiana, USA) in the range 400–4000 cm<sup>-1</sup>.

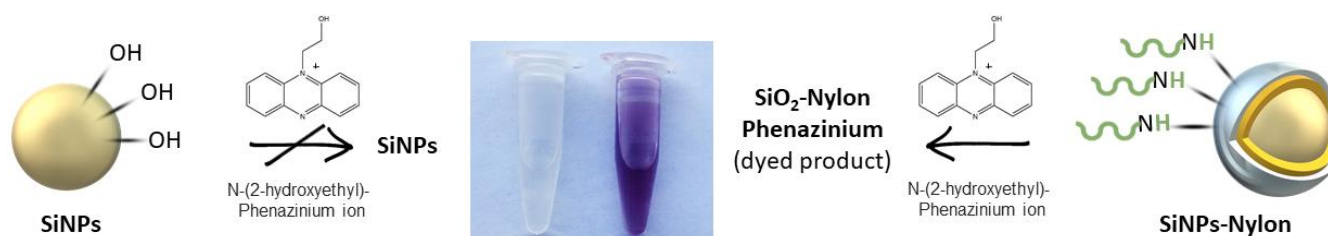

**Figure S13.** Scheme of the qualitative reaction of the nylon determination in SiNPs and SiNPs-Nylon with N-(2-hydroxyethyl)-Phenazinium ion. The reaction product is colored blue violet in the presence of amino groups. The initial SiNPs was used as a control.

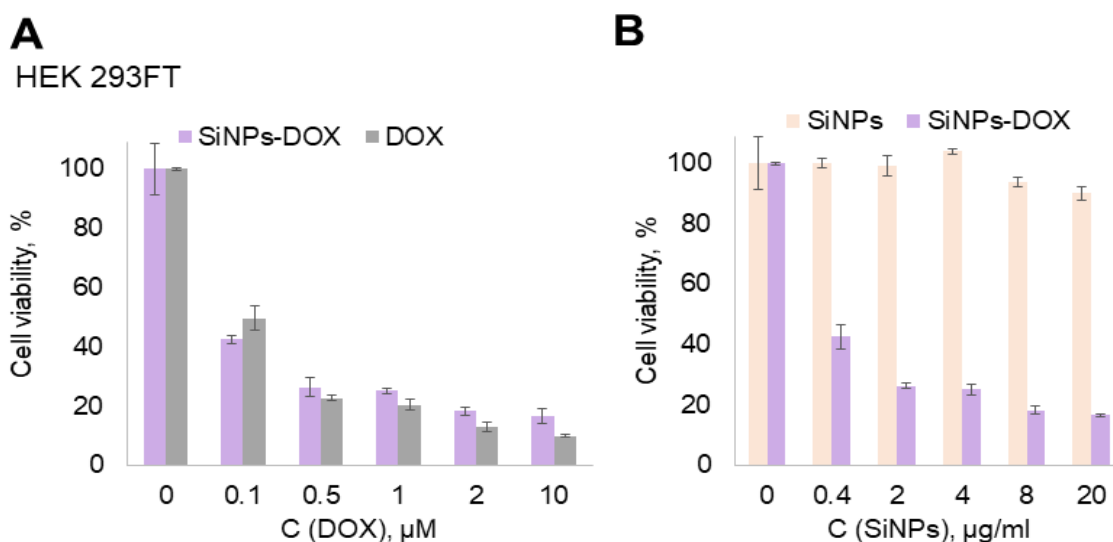

**Figure S14.** Cell viability assay. HEK 293FT cell line was incubated for 48 h with SiNPs, SiNPs–DOX, and DOX. Cells treated with PBS buffer were used as a 100% viability control. Cells were incubated with the same amount of free DOX or DOX loaded on SiNPs (A), or with the same mass of SiNPs and SiNPs–DOX (B). The IC<sub>50</sub> values for SiNPs-DOX and DOX are 0.08 ± 0.01 μM and 0.10 ± 0.02 μM, respectively.
