# Supplementary material for: Doxorubicin-Loaded Silica Nanocomposites for Cancer Treatment
Source: MDPI journal article supplement (doi:10.3390/coatings13020324), 2023-02-01
Supplement: s1 [file s1]

Archive with 1 entries (1 files):
- coatings-2159611-supplementary.pdf
